# Supplementary material for: Thirteen Ovary-Enriched Genes Are Individually Not Essential for Female Fertility in Mice
Source: MDPI journal article supplement (doi:10.3390/cells13100802), 2024-05-08
Supplement: s1 [file s1]

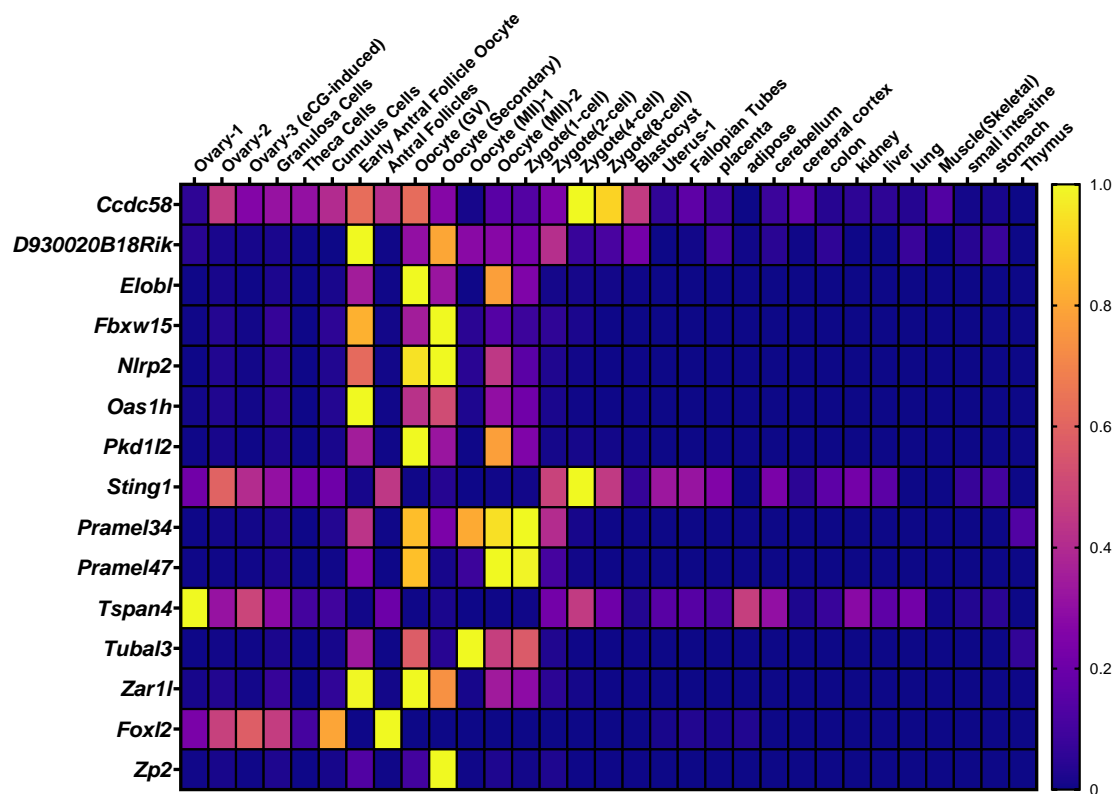

**Figure S1.** Expression patterns of candidate genes in mice, using the TPM values obtained from Mammalian Reproductive Genetics database v2.0, the expression levels of 13 genes (*Ccdc58*, *D930020B18Rik*, *Elovl*, *Fbxw15*, *Nlrp2*, *Oas1h*, *Pkd1l2*, *Pramel34*, *Pramel47*, *Sting1*, *Tspan4*, *Tubal3*, *Zar1l*) were shown as heatmap. The expression patterns of *Foxl2* and *Zp2*, which are well known to have important role in the ovary, are also shown at the bottom).

1  
2  
3  
4  
5  
6  
7  
8

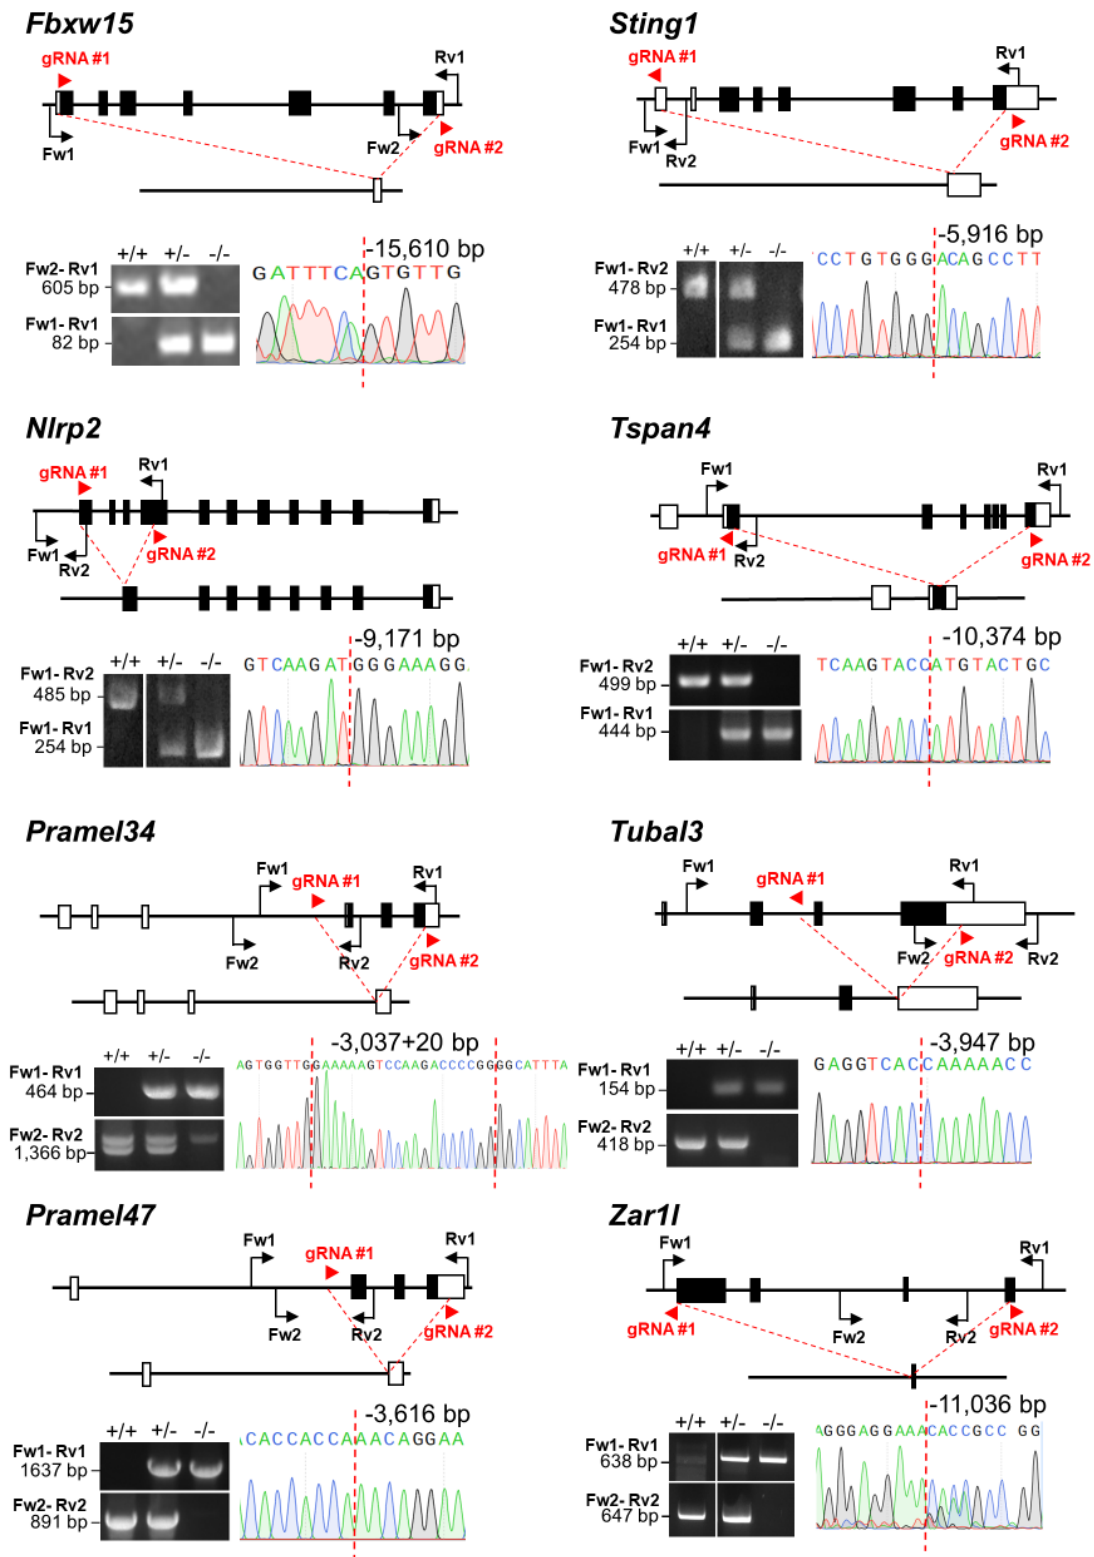

**Figure S2.** KO strategy, genotyping PCR and Sanger sequencing of *Fbxw15*, *Nlrp2*, *Pramel34*, *Pramel47*, *Sting1*, *Tspan4*, *Tubal3*, and *Zar1l*. Fw1/2: forward primer for the genotyping. Rv1/2: Reverse primers for the genotyping.
