# Supplementary material for: Thirteen Ovary-Enriched Genes Are Individually Not Essential for Female Fertility in Mice
Source: MDPI journal article supplement (doi:10.3390/cells13100802), 2024-05-08
Supplement: s1 [file s1]

| Gene symbol          | gRNA sequences |                      | PAM |
|----------------------|----------------|----------------------|-----|
| <i>Ccdc58</i>        | U              | ACGTTATTTATGTTGCCGAG | TGG |
|                      | D              | ACTCGGTCATCTCATCGCCT | GGG |
| <i>D930020B18Rik</i> | U              | GCCATGCGACACCCGCGACC | AGG |
|                      | D              | TGTCCCCACGCCCAGTTCTG | GGG |
| <i>Elobl</i>         | U              | AGCCATTCAGTTATACCCAG | GGG |
|                      | D              | CCCTAATCAATTTTTTGATG | AGG |
| <i>Fbxw15</i>        | U              | TCATCGGCAAACAAGGTAAA | TGG |
|                      | D              | AAAGGCCTATTTGCAAGCCC | AGG |
| <i>Nlrp2</i>         | U              | AGTCACCGTCCAGATCTTAG | AGG |
|                      | D              | GTGATTCGAGATCTAATCCT | GGG |
| <i>Oas1h</i>         | U              | GAGCAATCCGAGTGCTGCTA | AGG |
|                      | D              | AATCTGTCTAGTGATCATCG | AGG |
| <i>Pkd1l2</i>        | U              | TGGTGGATCGGACTCACGGG | AGG |
|                      | D              | CAGCTGCAGTTATATCCGGG | AGG |
| <i>Pramel34</i>      | U              | AAGTGGTTGATGTGATGGTG | AGG |
|                      | D              | GTGGGGTCAGAAAAACAGTG | TGG |
| <i>Pramel47</i>      | U              | ACCTCTTCATCCTAAACTGG | GGG |
|                      | D              | GCTTTAATGAGTTTACTAAC | AGG |
| <i>Sting1</i>        | U              | CAAAAGTGACAGGGCCCCAC | AGG |
|                      | D              | ACTGACCTCATCTGAGGCAT | GGG |
| <i>Tspan4</i>        | U              | GCAGGTTGAAGGCGAACATG | AGG |
|                      | D              | ACATGGTCATAGCGAAGGTG | AGG |
| <i>Tubal3</i>        | U              | CTGGTTGGCGTTGGTAGGCA | AGG |
|                      | D              | TTATATATCTAATGAATTAG | AGG |
| <i>Zar1l</i>         | U              | CAGAAAAGACGCTCCATTTG | AGG |
|                      | D              | AAAGACACATTGATGTCCGG | AGG |

**Table S1.** The sequences of gRNAs used for generating 13 different knockout mouse lines (*Ccdc58*, *D930020B18Rik*, *Elobl*, *Fbxw15*, *Nlrp2*, *Oas1h*, *Pkd1l2*, *Pramel34*, *Pramel47*, *Sting1*, *Tspan4*, *Tubal3*, *Zar1l*); U: Upstream of the target site, D: Downstream of the target site.

| Gene symbol          | Alleles | Forward Primer            | Reverse Primer            | Annealing  | Elongation | Band size (bp) |
|----------------------|---------|---------------------------|---------------------------|------------|------------|----------------|
| <i>Ccdc58</i>        | KO      | TTTGTGGGGAAAGGGGTACT      | GATGGAACCTGTCCTCTGGA      | 60°C, 30 s | 72°C, 30 s | 645            |
|                      | WT      | TTTGTGGGGAAAGGGGTACT      | CATACAGCTGTTTACAGGTTTGG   | 60°C, 30 s | 72°C, 30 s | 1,025          |
| <i>D930020B18Rik</i> | KO      | TCCGCCCATCGCTGTGTAGG      | TCCAATCGCCAAGGAGACCC      | 60°C, 30 s | 72°C, 30 s | 577            |
|                      | WT      | AGATGGCGTTTGTGGCCAGG      | TACACGTCTGTGCAACGTGG      | 60°C, 30 s | 72°C, 30 s | 677            |
| <i>Elobl</i>         | KO      | CCAGGGCTGAGCAAAGTAAG      | TGTAGCAGGCCCTATCATCC      | 65°C, 30 s | 72°C, 30 s | 672            |
|                      | WT      | TATTAATTGAATCCTTGGCTTTTGA | CTACCTGACTAGTGAAGCCACATTC | 65°C, 30 s | 72°C, 30 s | 876            |
| <i>Fbxw15</i>        | KO      | AGGCCACTGAAGATGGCGATCC    | TGCACCATCACATTTGGCCTC     | 60°C, 5 s  | 68°C, 5 s  | 82             |
|                      | WT      | CATAGTCACATACCTACACACGCAC | TGCACCATCACATTTGGCCTC     | 60°C, 5 s  | 68°C, 5 s  | 605            |
| <i>Nlrp2</i>         | KO      | GCTATGGCAGAAAGGTTACCAG    | CATCTTCTCTTCAGCAAACCTG    | 60°C, 5 s  | 68°C, 5 s  | 254            |
|                      | WT      | GCTATGGCAGAAAGGTTACCAG    | GGTGCTACCCATCATGCCTGAT    | 60°C, 5 s  | 68°C, 5 s  | 485            |
| <i>Oas1h</i>         | KO      | ACAAACCCAGAGTGTCAGG       | CCTCCCCCTTCACAGAGATTG     | 60°C, 30 s | 72°C, 30 s | 726            |
|                      | WT      | TTTGTCTGGTCAAGCACTGG      | GTGACGGTGACCTGGTTTTT      | 60°C, 30 s | 72°C, 30 s | 707            |
| <i>Pkd1l2</i>        | KO      | GCAGTGGTCCTAGGATGACC      | TATGATCAGAGCATATTAGG      | 60°C, 30 s | 72°C, 30 s | 685            |
|                      | WT      | GCTTGTTTCATGGACCTCTGATAC  | GGTCTATTTTCACCAGCATTCAG   | 60°C, 30 s | 72°C, 30 s | 669            |
| <i>Pramel34</i>      | KO      | AGCCATGCATATTCATTGGG      | GTGTCTTTCCAATCCTGGACCT    | 58°C, 30 s | 72°C, 30 s | 464            |
|                      | WT      | GAGATAGGGTTTCTCTGTATA     | TGTGTACTCCTCATGCTCCC      | 58°C, 30 s | 72°C, 90 s | 1,366          |
| <i>Pramel47</i>      | KO      | ACCCACAGTTGTCATCCTCC      | AGCAAAGGACTCATGTGCCA      | 58°C, 30 s | 72°C, 90 s | 1,637          |
|                      | WT      | TCCTGGTTTCAGCTCTGCAA      | GCCATGACAGTCATAAAGCC      | 58°C, 30 s | 72°C, 60 s | 891            |
| <i>Sting1</i>        | KO      | TGCTGTTTCATCTCAATCTCTCCTG | CATAGTAGGGTTGGTTGAGGCTCAG | 60°C, 5 s  | 68°C, 5 s  | 254            |
|                      | WT      | TGCTGTTTCATCTCAATCTCTCCTG | AACAAGTGCAACTCAGCTCGCTTC  | 60°C, 5 s  | 68°C, 5 s  | 478            |
| <i>Tspan4</i>        | KO      | GCAGCAGCCTGTATGGGCGC      | GTCTGGTGTCTGCTGCCACCC     | 65°C, 30 s | 72°C, 30 s | 444            |
|                      | WT      | GCAGCAGCCTGTATGGGCGC      | GGTGAGGCAAGGACGTGGGC      | 65°C, 30 s | 72°C, 30 s | 499            |
| <i>Tubal3</i>        | KO      | TATCCCATGGGTACATTGCCA     | AGGCTCTCAGTTAGCAAAGGT     | 58°C, 30 s | 72°C, 30 s | 154            |
|                      | WT      | CACTGGTACATCACAGAAGG      | TGCGTTGTTTTAGGGAAGGGG     | 58°C, 30 s | 72°C, 30 s | 418            |
| <i>Zar1l</i>         | KO      | TCCACTACAGCACAGCCAAT      | CCCCAAGGACTGAGTTACCA      | 60°C, 30 s | 72°C, 30 s | 638            |
|                      | WT      | AGAGGAGATGGGAGAGTGCTT     | CACATGGTTCAGGGTCAAGA      | 60°C, 30 s | 72°C, 30 s | 647            |

**Table S2.** The sequences of primes and PCR condition used for genotyping for 13 different knockout mouse lines (*Ccdc58*, *D930020B18Rik*, *Elobl*, *Fbxw15*, *Nlrp2*, *Oas1h*, *Pkd1l2*, *Pramel34*, *Pramel47*, *Sting1*, *Tspan4*, *Tubal3*, *Zar1l*).
